RESEARCH ARTICLE

# Phenotypic and Genetic Correlations of Feed Efficiency Traits with Growth and Carcass Traits in Nellore Cattle Selected for Postweaning Weight

Thais Matos Ceacero<sup>1</sup>, Maria Eugênia Zerlotti Mercadante<sup>1\*</sup>, Joslaine Noely dos Santos Gonçalves Cyrillo<sup>1</sup>, Roberta Carrilho Canesin<sup>1</sup>, Sarah Figueiredo Martins Bonilha<sup>1</sup>, Lucia Galvão de Albuquerque<sup>2</sup>

**1** Centro APTA Bovinos de Corte, Instituto de Zootecnia, Sertãozinho, SP, Brazil, **2** Faculdade de Ciências Agrárias e Veterinárias, Universidade Paulista “Júlio de Mesquita Filho”, Jaboticabal, SP, Brazil

\* [mercadante@iz.sp.gov.br](mailto:mercadante@iz.sp.gov.br)

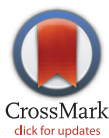

**OPEN ACCESS**

**Citation:** Ceacero TM, Mercadante MEZ, Cyrillo JNdSG, Canesin RC, Bonilha SFM, de Albuquerque LG (2016) Phenotypic and Genetic Correlations of Feed Efficiency Traits with Growth and Carcass Traits in Nellore Cattle Selected for Postweaning Weight. PLoS ONE 11(8): e0161366. doi:10.1371/journal.pone.0161366

**Editor:** Peter J. Hansen, University of Florida, UNITED STATES

**Received:** April 13, 2016

**Accepted:** August 4, 2016

**Published:** August 18, 2016

**Copyright:** © 2016 Ceacero et al. This is an open access article distributed under the terms of the [Creative Commons Attribution License](https://creativecommons.org/licenses/by/4.0/), which permits unrestricted use, distribution, and reproduction in any medium, provided the original author and source are credited.

**Data Availability Statement:** All relevant data are within the paper and its Supporting Information files.

**Funding:** This work was supported by Sao Paulo Research Foundation (FAPESP, grant #2009/16118-5) for financial support, National Council of Technological and Scientific Development of Brazil (CNPq) for providing research grants to MEZM SFMB LGA, and Coordination for the Improvement of Higher Education Personnel (CAPES) for providing grants to TMC RCC.

## Abstract

This study evaluated phenotypic ( $r_{ph}$ ) and genetic correlations ( $r_g$ ) between 8 feed efficiency traits and other traits of economic interest including weight at selection (WS), loin-eye area (LEA), backfat thickness (BF), and rump fat thickness (RF) in Nellore cattle. Feed efficiency traits were gain:feed, residual feed intake (RFI), residual feed intake adjusted for backfat thickness ( $RFI_b$ ) and for backfat and rump fat thickness ( $RFI_{sf}$ ), residual body weight gain (RG), residual intake and body weight gain (RIG), and residual intake and body weight gain using  $RFI_b$  ( $RIG_b$ ) and  $RFI_{sf}$  ( $RIG_{sf}$ ). The variance components were estimated by the restricted maximum likelihood method using a two-trait animal model. The heritability estimates ( $h^2$ ) were 0.14, 0.24, 0.20, 0.22, 0.19, 0.15, 0.11 and 0.11 for gain:feed, RFI,  $RFI_b$ ,  $RFI_{sf}$ , RG, RIG,  $RIG_b$  and  $RIG_{sf}$ , respectively. All  $r_{ph}$  values between traits were close to zero, except for the correlation of feed efficiency traits with dry matter intake and average daily gain. High  $r_g$  values were observed for the correlation of dry matter intake, average daily gain and metabolic weight with WS and hip height ( $>0.61$ ) and low to medium values (0.15 to 0.48) with the carcass traits (LEA, BF, RF). Among the feed efficiency traits, RG showed the highest  $r_g$  with WS and hip height (0.34 and 0.25) and the lowest  $r_g$  with subcutaneous fat thickness (-0.17 to 0.18). The  $r_g$  values of RFI,  $RFI_b$  and  $RFI_{sf}$  with WS (0.17, 0.23 and 0.22), BF (0.37, 0.33 and 0.33) and RF (0.30, 0.31 and 0.32) were unfavorable. The  $r_g$  values of gain:feed, RIG,  $RIG_b$  and  $RIG_{sf}$  with WS were low and favorable (0.07 to 0.22), while medium and unfavorable (-0.22 to -0.45) correlations were observed with fat thickness. The inclusion of subcutaneous fat thickness in the models used to calculate RFI did not reduce the  $r_g$  between these traits. Selecting animals for higher feed efficiency will result in little or no genetic change in growth and will decrease subcutaneous fat thickness in the carcass.

**Competing Interests:** The authors have declared that no competing interests exist.

## Introduction

The Brazilian meat industry is one of the most dynamic in the world. The average annual genetic trends for growth traits reported by Nellore breeding programs in Brazil ranges from 0.15 to 0.61% of the average/year for weaning weight and from 0.15 to 0.77% of the average/year for postweaning weights, while higher genetic trends are obtained for postweaning weight gain (0.11 to 1.02% of the average/year). As a correlated response, this selection has resulted in a genetic trend of 0.33% of the average/year in birth weight and of 0.35% of the average/year in mature cow weight [1]. These figures highlight the intense improvement work of technicians, breeders and companies commercializing genetic material to increase meat production of Nellore cattle, the most representative breed in the Brazilian cattle herd. However, although selection for higher weight at a specific age, associated with muscling and fertility traits, can be used to increase production efficiency, this selection approach disregards the main economic factor of animal production, i.e., feeding and consequently feed efficiency.

In *Bos taurus*, feed efficiency traits exhibit moderate heritability [2], low to high genetic correlations with growth (depending on the feed efficiency trait analyzed), and moderate genetic antagonism with carcass fat thickness. However, in addition to the fact that some genetic parameter estimates reported in the literature have high standard errors, fewer than a dozen studies on Zebu cattle raised in tropical production systems are available [3, 4]. The objective of this study was to estimate genetic correlations of different feed efficiency traits with growth and carcass traits in Nellore cattle. The selection of beef cattle for feed efficiency will lead to a reduction in production costs, but should not have a negative impact on weight or carcass quality.

## Material and Methods

The experiment was conducted in accordance with animal welfare guidelines according to State Law No. 11.977 of the State of São Paulo, Brazil. All animal procedures were approved by the Ethics and Animal Handling Committee of the Instituto de Zootecnia, Nova Odessa, SP, Brazil.

Records from 8,078 Nellore animals born between 1978 and 2013 to 320 bulls and 2,078 dams from Centro APTA Bovinos de Corte, Sertãozinho, São Paulo, Brazil (21°10' S; 47°57' W) were used. This Nellore herd consists of three selection lines started in 1978, two of them selected for higher postweaning weight and one control line selected for average postweaning weight [5, 6]. In the three lines, males are selected for yearling weight adjusted to 378 days of age (W378) obtained after feedlot performance testing for 168 days, and females are selected for postweaning weight adjusted to 550 days of age (W550) obtained on pasture.

Dry matter intake (DMI) and average daily gain (ADG) were obtained for intact males (n = 600) and females (n = 355), born between 2004 and 2013 to 78 bulls and 542 dams, in 21 performance tests after weaning on pasture. Prior to the test, the animals were allowed to adapt to the diet and facilities for a minimum period of 21 days. The animals started the test at a body weight of  $237 \pm 50$  kg and age of  $287 \pm 38$  days and remained in individual (n = 683) or collective pens equipped with the GrowSafe<sup>®</sup> System (GrowSafe Systems Ltd., Airdrie, Alberta, Canada) (n = 272) for  $84 \pm 15$  days. The animals had *ad libitum* access to diet and water. The feed composition of the diet offered was modified over the years, but was equivalent in the content of total digestible nutrients (62%) and crude protein (13%) [7]. Diet samples were obtained every week for the determination of dry matter. Daily DMI values were excluded if there were no leftovers in the individual pens or when the GrowSafe<sup>®</sup> System indicated daily assigned feed disappearance  $\leq 90\%$ .

The animals were weighed every 14 days after fasting for 12 h (2005 and 2006) and every 28 days for males born in 2007 and 2008 and for females born from 2009 to 2011 after fasting.

From 2009 to 2012, males were weighed weekly without fasting, with three weekly weight recordings on consecutive days in 2009 and 2010, two weekly weight recordings on consecutive days in 2011, and one weight recording per week in 2012. In 2013 and 2014, males were weighed without fasting every 14 days. In 2012, females were weighed on two consecutive days every 15 days. Therefore, each animal was weighed at least 4 times with prior fasting and at least 6 times without prior fasting.

Dry matter intake was obtained as the mean of all valid days of feed intake during the test period. Average daily gain was estimated by linear regression of weights on days on test (DOT):

$$y_i = \alpha + \beta * DOT_i + \epsilon_i$$

where  $y_i$  is the animal's weight in the  $i^{th}$  observation;  $\alpha$  is the intercept that represents the initial weight;  $\beta$  is the linear regression coefficient that represents ADG;  $DOT_i$  is the days on test in the  $i^{th}$  observation, and  $\epsilon_i$  is the random error associated with each observation. The mid-test metabolic body weight ( $BW^{0.75}$ ) was calculated as  $BW^{0.75} = [\alpha + \beta * (DOT/2)]^{0.75}$ .

Gain:feed was calculated as the ratio between ADG and DMI. Residual feed intake (RFI) was estimated as the residual of the linear regression equation of DMI on ADG and  $BW^{0.75}$ , and residual body weight gain (RG) was estimated as the residual of the regression equation of ADG on DMI and  $BW^{0.75}$  [8] within each contemporary group. Residual intake and body weight gain (RIG) was calculated from RFI and RG [9].

Three linear regression models were fitted to estimate RFI:

$$DMI = \beta_0 + \beta_1 ADG + \beta_2 BW^{0.75} + \epsilon \tag{1}$$

$$DMI = \beta_0 + \beta_1 ADG + \beta_2 BW^{0.75} + \beta_3 BF + \epsilon \tag{2}$$

$$DMI = \beta_0 + \beta_1 ADG + \beta_2 BW^{0.75} + \beta_3 BF + \beta_4 RF + \epsilon \tag{3}$$

where  $\beta_0$  is the intercept and  $\beta_1$ ,  $\beta_2$ ,  $\beta_3$  and  $\beta_4$  are the partial regression coefficients of DMI on ADG,  $BW^{0.75}$ , backfat thickness (BF) and rump fat thickness (RF), respectively, and  $\epsilon$  in models 1, 2 and 3 is RFI, RFI adjusted for BF ( $RFI_b$ ) and RFI adjusted for BF and RF ( $RFI_{sf}$ ), respectively.

The following linear regression model was fitted to estimate RG:

$$ADG = \beta_0 + \beta_1 DMI + \beta_2 BW^{0.75} + \epsilon$$

where  $\beta_0$  is the intercept and  $\beta_1$  and  $\beta_2$  are the partial regression coefficients of ADG on DMI and  $BW^{0.75}$ , respectively, and  $\epsilon$  is RG.

Residual intake and gain was calculated as:

$$RIG = \frac{RG}{\sigma_{RG}} - \frac{RFI}{\sigma_{RFI}}$$

where  $\sigma_{RG}$  is the standard deviation of the mean RG of the contemporary group and  $\sigma_{RFI}$  is the standard deviation of the mean RFI of the contemporary group. The residual intakes and gains using  $RFI_b$  ( $RIG_b$ ) and  $RFI_{sf}$  ( $RIG_{sf}$ ) were also calculated considering the standard deviations of the mean of the respective traits for the contemporary group.

Weight at selection (WS), defined as W378 (males) and W550 (females), was analyzed as a single trait. Since hip height (HH) was obtained in males and females at yearling and postweaning, respectively, it was also analyzed as a single trait. The same was done for chest

circumference (CC). Weight at selection was obtained for animals born from 1978 to 2013, HH for animals born from 1985 to 2013, and CC for animals born from 1989 to 2013.

The carcass traits were measured by ultrasound [Pie Medical 401347-Aquila, 3.5-MHz, 18-cm linear probe; Pie Medical Equipment B.V., Maastricht, The Netherlands] in males (yearling) born from 1996 to 2002 (except for the years 1998, 2000 and 2003) and in females (post-weaning) born from 2004 to 2013. For the measurement of loin-eye area (LEA) and BF, the transducer was placed perpendicular to the spine in a transverse position over the longissimus dorsi muscle between the 12<sup>th</sup> and 13<sup>th</sup> rib on the left side of the animal using a standoff pad. Rump fat thickness was measured by placing the transducer at the junction of the gluteus medius and biceps femoris muscles located between the hook and pin bone [10]. The images were saved and subsequently analyzed using the Echo Image Viewer 1.0 (Pie Medical Equipment B.V., Maastricht, The Netherlands).

Animals with more than one record outside the interval of  $\pm 3.5$  standard deviations from the mean of the contemporary group were eliminated from the database. For the growth and carcass traits, the contemporary groups were defined as year of birth of the animal, selection line, and sex. For the feed efficiency traits, the contemporary group was defined as year of birth (2004 to 2013), test facility [3 facilities with at least 32 individual pens or one collective pen], and sex (intact male or female). Table 1 shows the data structure and descriptive statistics of the traits.

The (co)variance components were estimated by the restricted maximum likelihood method under a two-trait animal model using the WOMBAT program [11]. For the feed efficiency traits, DMI, ADG and  $BW^{0.75}$ , the model included random direct additive genetic effects, the fixed effects of contemporary group, and age of animal (linear effect) and age of dam (linear and quadratic effects) as covariates. For the other traits (growth and carcass), the model included random direct additive genetic and maternal permanent environmental effects (only

**Table 1. Description of the final data set of feed efficiency, growth and carcass traits.**

| Trait                     | Mean $\pm$ SD      | No. of animals with records | No. of contemporary groups |
|---------------------------|--------------------|-----------------------------|----------------------------|
| DMI (kg/day)              | 6.83 $\pm$ 1.33    | 955                         | 21                         |
| ADG (kg)                  | 1.00 $\pm$ 0.26    | 955                         | 21                         |
| $BW^{0.75}$ (kg)          | 68.2 $\pm$ 10.1    | 955                         | 21                         |
| Gain:feed (kg gain/kg DM) | 0.148 $\pm$ 0.033  | 955                         | 21                         |
| RFI (kg/day)              | -0.011 $\pm$ 0.60  | 955                         | 21                         |
| $RFI_b$ (kg/day)          | -0.0091 $\pm$ 0.60 | 894                         | 21                         |
| $RFI_{sf}$ (kg/day)       | -0.0090 $\pm$ 0.59 | 891                         | 21                         |
| RG (kg/day)               | 0.002 $\pm$ 0.12   | 955                         | 21                         |
| RIG                       | 0.044 $\pm$ 1.71   | 955                         | 21                         |
| $RIG_b$                   | 0.042 $\pm$ 1.70   | 894                         | 21                         |
| $RIG_{sf}$                | 0.043 $\pm$ 1.69   | 891                         | 21                         |
| WS (kg)                   | 300 $\pm$ 48.8     | 8,078                       | 201                        |
| HH (cm)                   | 132 $\pm$ 5.43     | 6,548                       | 169                        |
| CC (cm)                   | 164 $\pm$ 8.72     | 3,876                       | 100                        |
| LEA (cm <sup>2</sup> )    | 51.4 $\pm$ 8.89    | 2,283                       | 65                         |
| BF (mm)                   | 1.75 $\pm$ 1.42    | 2,285                       | 65                         |
| RF (mm)                   | 5.08 $\pm$ 2.54    | 1,817                       | 51                         |

DMI, dry matter intake; ADG, average daily gain;  $BW^{0.75}$ , metabolic body weight; RFI, residual feed intake;  $RFI_b$ , residual feed intake adjusted for backfat thickness;  $RFI_{sf}$ , residual feed intake adjusted for backfat and rump fat thickness; RG, residual body weight gain; RIG, residual intake and gain;  $RIG_b$ , residual intake and gain using  $RFI_b$ ;  $RIG_{sf}$ , residual intake and gain using  $RFI_{sf}$ ; WS, weight at selection; HH, hip height of males and females at selection; CC, chest circumference of males and females at selection; LEA, loin-eye area; BF, backfat thickness; RF, rump fat thickness.

doi:10.1371/journal.pone.0161366.t001

for WS), in addition to the fixed effects of contemporary group and month of birth of the animal, age of animal (linear effect), and age of dam (linear and quadratic effects). A pedigree file containing 8,478 animals was used in all analyses.

The general model can be written in matrix form as:

$$y = X\beta + Z\alpha + Wc + \epsilon$$

where  $y$  is the vector of observations;  $\beta$  is the vector of fixed effects associated with the incidence matrix  $X$ ;  $\alpha$  is the vector of random direct additive genetic effects associated with the incidence matrix  $Z$ ;  $c$  is the vector of maternal permanent environmental effects associated with the incidence matrix  $W$ , and  $\epsilon$  is the vector of residuals.

In this study, it was assumed that:

$$E[y] = X\beta; \text{Var}(\alpha) = A \oplus S_{\alpha}; \text{Var}(c) = I \oplus S_c \text{ and } \text{Var}(e) = I \oplus S_e$$

where  $S_{\alpha}$  is the matrix of direct additive genetic (co)variances;  $S_c$  is the matrix of maternal permanent environmental variance;  $S_e$  is the matrix of residual (co)variances;  $A$  is the numerator of the additive genetic relationship matrix;  $I$  is an identity matrix, and  $\oplus$  is the direct product between matrices. It was also assumed that  $\alpha$ ,  $c$  and  $e$  are not correlated.

## Results

The general equations of predicted DMI and ADG were:  $DMIp = 2.112 (\pm 0.134) \times ADG + 0.084 (\pm 0.003) \times BW^{0.75}$  ( $R^2 = 0.80$ ) and  $ADGp = 0.099 (\pm 0.006) \times DMI + 0.002 (\pm 0.001) \times BW^{0.75}$  ( $R^2 = 0.75$ ), respectively. The mean RFI was  $-0.012 \pm 0.712$  kg/day ( $-2.314$  to  $4.964$  kg/day) in males and  $-0.010 \pm 0.375$  kg/day ( $-1.176$  to  $1.287$  kg/day) in females. The mean RG was  $0.002 \pm 0.136$  kg/day ( $-0.707$  to  $0.332$  kg/day) in males and  $0.003 \pm 0.097$  kg/day ( $-0.283$  to  $0.329$  kg/day) in females.

The coefficient of variation of DMI, ADG and  $BW^{0.75}$  was higher (19%, 26% and 15%, respectively) than the coefficient of variation of RFI and RG (8.7% and 12%), which were calculated using mean DMI and ADG, respectively. Coefficients of variation of 4% to 8% for RFI and of 10% to 14% for RG were reported in studies on *Bos taurus* [2]. The coefficients of variation were 7% and 10% for RFI and 20% for RG in Nellore cattle (*Bos indicus*) [3, 4]. These data indicate considerable variation in RFI and RG. Fig 1 illustrates the dispersion of observed and predicted DMI and ADG. The standard deviations of RFI,  $RFI_b$  and  $RFI_{sf}$  were similar.

Dry matter intake corresponded to 2.41% and 2.54% of the average body weight of males and females, respectively, during the test. A crude estimate of the percentage of feed consumed for maintenance, implicit in the RFI equation, can be obtained by  $(100 \times \beta_1 \times BW^{0.75}) / (\beta_1 \times BW^{0.75} \times \beta_2 \times ADG)$ , where  $\beta_1$  and  $\beta_2$  are the partial regression coefficients of DMI on ADG and  $BW^{0.75}$ , respectively, and  $BW^{0.75}$  and ADG are the means shown in Table 1 [12]. Considering all animals, 47% of DMI was required for maintenance. This percentage was 44.76% for males and

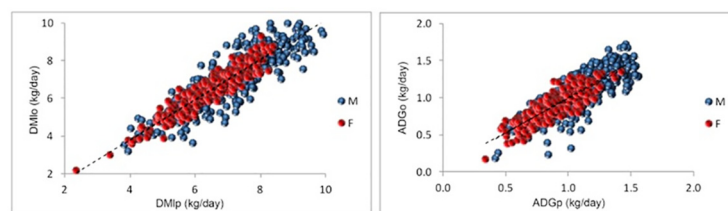

**Fig 1. Relationship between observed (DMIo and ADGo) and predicted (DMIp and ADGp) dry matter intake (left) and average daily gain (right).**

doi:10.1371/journal.pone.0161366.g001

**Table 2. Variance components and heritability estimates for the feed efficiency traits.**

| Trait <sup>1</sup> | $\sigma^2_a$ | $\sigma^2_e$ | $h^2 \pm SE$ |
|--------------------|--------------|--------------|--------------|
| Gain:feed          | 0.06         | 0.38         | 0.14 ± 0.06  |
| RFI                | 0.08         | 0.28         | 0.24 ± 0.06  |
| RFI <sub>b</sub>   | 0.07         | 0.29         | 0.20 ± 0.06  |
| RFI <sub>sf</sub>  | 0.07         | 0.28         | 0.22 ± 0.06  |
| RG                 | 0.003        | 0.01         | 0.19 ± 0.06  |
| RIG                | 0.45         | 2.44         | 0.15 ± 0.05  |
| RIG <sub>b</sub>   | 0.34         | 2.53         | 0.11 ± 0.05  |
| RIG <sub>sf</sub>  | 0.31         | 2.51         | 0.11 ± 0.05  |

RFI, residual feed intake; RFI<sub>b</sub>, residual feed intake adjusted for backfat thickness; RFI<sub>sf</sub>, residual feed intake adjusted for backfat and rump fat thickness; RG, residual body weight gain; RIG, residual intake and gain; RIG<sub>b</sub>, residual intake and gain using RFI<sub>b</sub>; RIG<sub>sf</sub>, residual intake and gain using RFI<sub>sf</sub>;  $\sigma^2_a$ , additive genetic variance component;  $\sigma^2_e$ , residual variance component;  $h^2$ , heritability; SE, standard error.

doi:10.1371/journal.pone.0161366.t002

49.48% for females, suggesting that females were less efficient than males. In fact, a study [13] analyzing part of the same database as used here, reported a better gain:feed ratio for males compared to females. Finishing *Bos taurus* steers attending the Australian, Korean and Japanese markets required 67%, 72% and 61% of DMI for maintenance [12]. These results support the view that *Bos indicus* animals have lower maintenance requirements than *Bos taurus* [14].

The variance components and heritability estimates of the feed efficiency traits were obtained in a series of two-trait analyses between these traits. The mean values are shown in Table 2. The heritability estimates for component traits of RFI and for the growth (WS, HH, and CC) and ultrasound-measured carcass traits (LEA, BF, and RF) were also obtained by two-trait analyses and the mean values are shown in Table 3. This table also displays the correlations between these traits. Table 4 shows the phenotypic and genetic correlations between the feed efficiency traits and the growth and carcass traits.

## Discussion

The heritability estimates for the feed efficiency traits ranged from 0.11 to 0.24 (Table 2). The lowest estimate was obtained for the feed efficiency trait whose concept comprised a larger

**Table 3. Heritability (diagonal), phenotypic correlation (below the diagonal) and genetic correlation (above the diagonal) between dry matter intake, average daily gain, metabolic body weight, growth and carcass traits.**

| Trait              | DMI         | ADG         | BW <sup>0.75</sup> | WS          | HH          | CC          | LEA         | BF           | RF           |
|--------------------|-------------|-------------|--------------------|-------------|-------------|-------------|-------------|--------------|--------------|
| DMI                | 0.45 ± 0.05 | 0.83 ± 0.06 | 0.82 ± 0.05        | 0.8 ± 0.06  | 0.61 ± 0.07 | 0.79 ± 0.07 | 0.48 ± 0.10 | 0.29 ± 0.13  | 0.39 ± 0.11  |
| ADG                | 0.56        | 0.41 ± 0.06 | 0.73 ± 0.08        | 0.84 ± 0.05 | 0.62 ± 0.08 | 0.80 ± 0.08 | 0.41 ± 0.11 | 0.15 ± 0.13  | 0.24 ± 0.12  |
| BW <sup>0.75</sup> | 0.65        | 0.42        | 0.53 ± 0.06        | 0.84 ± 0.05 | 0.80 ± 0.04 | 0.90 ± 0.03 | 0.63 ± 0.07 | 0.14 ± 0.12  | 0.30 ± 0.11  |
| WS                 | 0.60        | 0.61        | 0.83               | 0.40 ± 0.03 | 0.75 ± 0.02 | 0.87 ± 0.02 | 0.48 ± 0.06 | -0.02 ± 0.10 | 0.11 ± 0.10  |
| HH                 | 0.45        | 0.36        | 0.69               | 0.67        | 0.61 ± 0.02 | 0.64 ± 0.04 | 0.19 ± 0.07 | -0.15 ± 0.09 | -0.03 ± 0.09 |
| CC                 | 0.55        | 0.60        | 0.75               | 0.73        | 0.57        | 0.31 ± 0.03 | 0.38 ± 0.08 | 0.17 ± 0.11  | 0.29 ± 0.10  |
| LEA                | 0.44        | 0.36        | 0.59               | 0.49        | 0.31        | 0.45        | 0.44 ± 0.05 | 0.09 ± 0.10  | 0.18 ± 0.10  |
| BF                 | 0.23        | 0.15        | 0.29               | 0.22        | 0.65        | 0.28        | 0.20        | 0.30 ± 0.04  | 0.79 ± 0.05  |
| RF                 | 0.25        | 0.21        | 0.29               | 0.26        | 0.07        | 0.30        | 0.25        | 0.61         | 0.38 ± 0.05  |

DMI, dry matter intake; ADG, average daily gain; BW<sup>0.75</sup>, metabolic body weight; WS, weight at selection; HH, hip height of males and females at selection; CC, chest circumference of males and females at selection; LEA, loin-eye area; BF, backfat thickness; RF, rump fat thickness.

doi:10.1371/journal.pone.0161366.t003



**Table 4. Phenotypic and genetic correlations of dry matter intake, average daily gain, weight at selection, hip height, chest circumference, loin-eye area, backfat thickness and rump fat thickness with the feed efficiency traits.**

| Trait                  | DMI          | ADG         | WS          | HH          | CC          | LEA          | BF           | RF           |
|------------------------|--------------|-------------|-------------|-------------|-------------|--------------|--------------|--------------|
| Phenotypic correlation |              |             |             |             |             |              |              |              |
| Gain:feed              | -0.28        | 0.58        | 0.10        | -0.03       | 0.07        | 0.04         | -0.02        | 0.01         |
| RFI                    | 0.73         | 0.04        | 0.06        | 0.04        | 0.06        | 0.03         | 0.05         | 0.06         |
| RFI <sub>b</sub>       | 0.71         | 0.02        | 0.05        | 0.03        | 0.04        | 0.03         | 0.03         | 0.04         |
| RFI <sub>sf</sub>      | 0.70         | 0.02        | 0.05        | 0.04        | 0.04        | 0.01         | 0.02         | 0.03         |
| RG                     | -0.10        | 0.68        | 0.17        | 0.00        | 0.09        | 0.03         | -0.03        | 0.01         |
| RIG                    | -0.44        | 0.34        | 0.04        | -0.03       | 0.00        | 0.01         | -0.08        | -0.05        |
| RIG <sub>b</sub>       | -0.41        | 0.35        | 0.05        | -0.03       | 0.01        | 0.00         | -0.04        | -0.04        |
| RIG <sub>sf</sub>      | -0.41        | 0.35        | 0.05        | -0.04       | 0.01        | 0.00         | -0.05        | -0.02        |
| Genetic correlation    |              |             |             |             |             |              |              |              |
| Gain:feed              | -0.11 ± 0.18 | 0.39 ± 0.15 | 0.09 ± 0.15 | 0.08 ± 0.15 | 0.15 ± 0.20 | 0.01 ± 0.19  | -0.22 ± 0.20 | -0.23 ± 0.20 |
| RFI                    | 0.68 ± 0.08  | 0.33 ± 0.16 | 0.17 ± 0.14 | 0.06 ± 0.13 | 0.14 ± 0.17 | 0.00 ± 0.16  | 0.37 ± 0.17  | 0.30 ± 0.16  |
| RFI <sub>b</sub>       | 0.73 ± 0.09  | 0.40 ± 0.17 | 0.23 ± 0.16 | 0.06 ± 0.14 | 0.14 ± 0.18 | -0.06 ± 0.17 | 0.33 ± 0.19  | 0.31 ± 0.17  |
| RFI <sub>sf</sub>      | 0.71 ± 0.09  | 0.38 ± 0.17 | 0.22 ± 0.15 | 0.08 ± 0.14 | 0.14 ± 0.18 | -0.04 ± 0.19 | 0.33 ± 0.18  | 0.32 ± 0.17  |
| RG                     | 0.21 ± 0.17  | 0.66 ± 0.09 | 0.34 ± 0.14 | 0.25 ± 0.14 | 0.34 ± 0.18 | 0.09 ± 0.17  | -0.17 ± 0.17 | -0.18 ± 0.17 |
| RIG                    | -0.27 ± 0.16 | 0.19 ± 0.17 | 0.10 ± 0.15 | 0.13 ± 0.14 | 0.17 ± 0.19 | 0.16 ± 0.19  | -0.38 ± 0.20 | -0.31 ± 0.20 |
| RIG <sub>b</sub>       | -0.27 ± 0.19 | 0.14 ± 0.20 | 0.08 ± 0.17 | 0.13 ± 0.14 | 0.22 ± 0.22 | 0.28 ± 0.24  | -0.45 ± 0.26 | -0.42 ± 0.25 |
| RIG <sub>sf</sub>      | -0.28 ± 0.18 | 0.12 ± 0.20 | 0.07 ± 0.17 | 0.15 ± 0.16 | 0.20 ± 0.22 | 0.29 ± 0.23  | -0.45 ± 0.26 | -0.43 ± 0.25 |

DMI, dry matter intake; ADG, average daily gain; RFI, residual feed intake; RFI<sub>b</sub>, residual feed intake adjusted for backfat thickness; RFI<sub>sf</sub>, residual feed intake adjusted for backfat and rump thickness; RG, residual body weight gain; RIG, residual intake and gain; RIG<sub>b</sub>, residual intake and gain using RFI<sub>b</sub>; RIG<sub>sf</sub>, residual intake and gain using RFI<sub>sf</sub>; WS, weight at selection; HH, hip height of males and females at selection; CC, chest circumference of males and females at selection; LEA, loin-eye area; BF, backfat thickness; RF, rump fat thickness.

doi:10.1371/journal.pone.0161366.t004

number of traits (RIG<sub>b</sub> and RIG<sub>sf</sub>), while the highest estimate was found for RFI. Pooled heritabilities higher than those estimated in the present study (0.23 ± 0.013, 0.33 ± 0.013 and 0.28 ± 0.030 for feed:gain, RFI and RG, respectively) were reported in a comprehensive meta-analysis [2]. However, this meta-analysis mainly included studies on *Bos taurus* or composites. Also, a meta-analysis comprising 39 heritability estimates [15] found a pooled heritability of 0.255 ± 0.008 for RFI, a value very similar to that estimated in the present study. Studies investigating Nellore cattle raised in Brazil reported higher heritabilities for feed:gain, RFI, RG and RIG (0.313 ± 0.110, 0.375 ± 0.162, 0.406 ± 0.147 and 0.544 ± 0.173, respectively) [4] and higher “genomic heritabilities” (the proportion of phenotypic variance explained by genome markers) for feed:gain, gain:feed and RFI (0.39, 0.47 and 0.33, respectively) [3].

Although RG has been proposed concomitantly with RFI [8], genetic parameter estimates for this trait have only been reported in recent years. In contrast to RFI in which negative values indicate more efficient animals, positive values of RG indicate more efficient animals. Residual gain is essentially a growth trait since ADG is adjusted for DMI and BW<sup>0.75</sup>. However, in the present study the heritability for RG (0.19 ± 0.06) was substantially lower than that estimated for ADG which was 0.41 (Table 3), probably because a large part of the genetic variation in ADG is due to genetic differences in DMI between animals. The RIG trait was proposed later [9]. The authors justified the proposal of this trait by the fact that the phenotypic independence between RFI and ADG is a reason why breeders do not adopt the former in selection programs, since animals with slow growth (undesirable trait) can be classified as efficient (negative RFI). The phenotypic independence between RG and DMI creates a similar situation. One solution to this problem was the combination of RFI and RG (i.e., RIG), which guarantees

the independence of this trait from  $BW^{0.75}$ , as well as a negative phenotypic correlation with DMI and a positive phenotypic correlation with ADG. Consequently, RIG reduces (but does not eliminate) the probability of a slow-growing animal to be highly ranked based on RIG [2].

The heritabilities for the component traits of feed efficiency (DMI, ADG, and  $BW^{0.75}$ ), growth traits and ultrasound-measured carcass traits (Table 3) were higher than the estimates obtained for the feed efficiency traits. These results agree with those reported in meta-analyses of heritabilities for feed efficiency traits in cattle [2, 15]. In general, the component traits of feed efficiency have a higher heritability than feed efficiency traits. This finding might be explained by the fact that the residuals (in the case of RFI, RG, and RIG) include not only the variation that is not captured by the independent variables of the prediction equation, but also random measurement errors of DMI, ADG (and BF and RF in the case of  $RFI_b$ ,  $RFI_{sf}$ ,  $RIG_b$  and  $RIG_{sf}$ ), rather than simply the separate measurement error of each trait as is the case for DMI, ADG, BF and RF [2].

The use of different models for predicting DMI can provide different heritabilities for RFI [16]. The inclusion of subcutaneous fat thickness in the prediction model of DMI slightly reduced the  $h^2$  estimate of  $RFI_b$ ,  $RFI_{sf}$ ,  $RIG_b$  and  $RIG_{sf}$ . In other words, genetic differences in feed efficiency can also be due to differences in the composition of weight gain. However, this may depend on the age at which the animals are evaluated since more energy is used for fat deposition than for protein deposition, while fat maintenance requires less energy than protein maintenance [17]. Lower heritabilities of RFI adjusted for fat thickness, compared to the heritability of RFI estimated with the traditional model, were also reported for Brangus heifers [18] and Charolais steers [19]. However, no difference between the heritabilities for RFI and  $RFI_{sf}$  was observed in different *Bos taurus* breeds [20] or in Angus steers [19].

Table 3 shows the genetic and phenotypic correlations between the component traits of feed efficiency and the growth and carcass traits. Selection for growth (WS), a selection criterion that has been used in the herd of the present study since 1980 [5], leads to an increase in ADG,  $BW^{0.75}$ , HH, CC, and LEA. This selection exerts little effect on fat deposition in the carcass, but invariably increases feed intake (DMI). The results are consistent with the findings of other studies [8, 12, 21]. High phenotypic and genetic correlations between growth traits and DMI have been widely described and discussed in the literature for different domestic animal species other than beef cattle [22].

The phenotypic relationships created by construction of the traits RFI, RG and RIG, i.e., zero correlations between RFI and ADG and between RG and DMI, a negative correlation between RIG and DMI and a positive correlation between RIG and ADG, do not necessarily imply similar genetic relationships (Table 4). The genetic correlation estimates had high standard errors due to the small number of animals with DMI records, a trait that is difficult to measure. Despite the high standard errors of the genetic correlation estimates, the selection of low RFI animals will result in a decrease in DMI but also in ADG, which is unfavorable, while the selection of high RFI animals will increase both ADG and DMI, which is also unfavorable. On the other hand, although the selection of high RIG animals leads to a decrease in DMI and to an increase in ADG, selection exclusively based on RIG would not be justified (Table 4) since the genetic correlations between these traits are so low and RIG is the least heritable feed efficiency trait (Table 2). High and favorable genetic correlations between RIG and DMI ( $-0.35 \pm 0.10$ ) and between RIG and ADG ( $0.47 \pm 0.10$ ), which are higher than those estimated in the present study (Table 4), have been reported [9].

One may recommend the inclusion of carcass fat thickness in the prediction model of DMI for calculating RFI so that RFI is phenotypically independent of BF and RF [18–20, 23]. However, this procedure may not guarantee a zero genetic correlation between these traits, although in the present study the genetic correlation of  $RFI_b$  and  $RFI_{sf}$  with carcass fat thickness was



slightly lower (Table 4). A highly consistent result obtained in the present study was that the genetic correlations between the eight feed efficiency traits and carcass fat thickness were invariably antagonistic, i.e., selecting animals that are genetically more efficient in terms of feed utilization will lead to a decrease in the breeding value for fat thickness, as observed in other studies [4, 12, 19]. A meta-analysis [2] reported a low positive pooled genetic correlation (0.20) between RFI and fat thickness in the carcass. However, an antagonistic correlation between RFI and carcass fat was observed in Charolais cattle that were finished late, but not in Angus cattle that were finished early [19]. Logically, lower feed intake for the same ADG and the same metabolic body weight (low RFI) must have costs for the animals. Lower fat deposition, which requires more energy than muscle deposition, might be one of them. However, the genetic correlations were of low to medium magnitude and associated with high standard errors; thus, this genetic relationship, which may differ between breeds, diets and phases of life of the animal, is not well established. The decrease in the breeding value of animals for carcass fat deposition may represent a problem for *Bos indicus* beef breeds. In fact, a relationship between the myofibrillar fragmentation index and tenderness, measured as shear force, was described in Nellore carcasses with greater BF compared to those with lower BF, suggesting possible tenderness problems in animals with a leaner carcass [24]. However, it is well established that the retail beef yield is lower for animals with a greater fat cover in the carcass [25], suggesting that it is desirable to select animals with moderate but not high breeding values for BF and RF.

Although selection for higher growth (WS) results in an increase in DMI and ADG (Table 3), it seems to have little effect on feed efficiency traits since the correlations with these traits were low (0.07 to 0.23), even with gain:feed (Table 4). An exception was RG whose genetic correlation with WS was slightly higher (0.34). Similar feed conversion was reported in Angus cattle (*Bos taurus*) lines selected for high and low growth rates compared to the unselected control line, with no evidence of the loss of feed efficiency after 15 years of selection for growth [26]. In Nellore cattle (*Bos indicus*), these results were confirmed by the similar RFI of animals from two lines selected for growth (high postweaning weight versus control) [27].

In conclusion, feed efficiency, growth and carcass traits of Nellore cattle obtained postweaning show sufficient genetic variability to respond to selection; however, the genetic progress will be slower for the feed efficiency traits than for the other traits. In this breed, RFI is the most heritable feed efficiency trait. Additionally, there is evidence of low genetic antagonism between RFI and growth and of high genetic synergism between RFI and DMI. This fact makes the trait eligible for selection for higher feed efficiency. Selecting animals that convert feed more efficiently will imply a certain opposite correlated response in fat thickness, i.e., an antagonism of medium magnitude exists between the effect of genes for feed efficiency and the genes for carcass fat deposition in Nellore cattle.

## Supporting Information

**S1 File. Pedigree information, model of analysis, parameter estimates, and the resulting covariance matrices for Tables 2 and 4.**

(DOCX)

**S2 File. Pedigree information, model of analysis, parameter estimates, and the resulting covariance matrices for Table 3.**

(DOCX)

## Author Contributions

**Conceptualization:** MEZM JNSGC SFMB LGA.

**Data curation:** MEZM JNSGC.

**Formal analysis:** TMC MEZM.

**Funding acquisition:** LGA.

**Investigation:** TMC RCC.

**Methodology:** TMC MEZM.

**Resources:** MEZM JNSGC LGA.

**Validation:** TMC MEZM.

**Visualization:** TMC MEZM RCC.

**Writing - original draft:** TMC MEZM.

**Writing - review & editing:** TMC MEZM RCC.

## References

1. Albuquerque LG, Mercadante MEZ, Eler JP. Recent studies on the genetic basis for selection of *Bos indicus* for beef production. 8th World Congress on Genetics Applied to Livestock Production; Belo Horizonte, MG, Brasil: World Congress on Genetics Applied to Livestock Production; 2006. p. 1–7.
2. Berry DP, Crowley JJ. CELL BIOLOGY SYMPOSIUM: Genetics of feed efficiency in dairy and beef cattle. *Journal of Animal Science*. 2013; 91(4):1594–613. doi: [10.2527/jas.2012-5862](https://doi.org/10.2527/jas.2012-5862). WOS:000319693600008. PMID: [23345557](https://pubmed.ncbi.nlm.nih.gov/23345557/)
3. Oliveira PSN, Cesar ASM, Nascimento ML, Chaves AS, Tizioto PC, Tullio RR, et al. Identification of genomic regions associated with feed efficiency in Nelore cattle. *BMC Genetics*. 2014; 15. doi: [10.1186/s12863-014-0100-0](https://doi.org/10.1186/s12863-014-0100-0). WOS:000343677100001.
4. Santana MHA, Oliveira Junior GA, Gomes RC, Silva SL, Leme PR, Stella TR, et al. Genetic parameter estimates for feed efficiency and dry matter intake and their association with growth and carcass traits in Nelore cattle. *Livestock Science*. 2014; 167:80–5. doi: [10.1016/j.livsci.2014.06.002](https://doi.org/10.1016/j.livsci.2014.06.002). WOS:000341550900011.
5. Coutinho CC, Mercadante MEZ, Jorge AM, Paz CCP, El Faro L, Monteiro FM. Growth curves of carcass traits obtained by ultrasonography in three lines of Nelore cattle selected for body weight. *Genetics and Molecular Research*. 2015; 14(4):14076–87. doi: [10.4238/2015.October.29.27](https://doi.org/10.4238/2015.October.29.27). WOS:000364582000105. PMID: [26535722](https://pubmed.ncbi.nlm.nih.gov/26535722/)
6. Mercadante MEZ, Packer IU, Razook AG, Cyrillo JNSG, Figueiredo LA. Direct and correlated responses to selection for yearling weight on reproductive performance of Nelore cows. *Journal of Animal Science*. 2003; 81(2):376–84. WOS:000186717100004. PMID: [12643480](https://pubmed.ncbi.nlm.nih.gov/12643480/)
7. Grion AL, Mercadante MEZ, Cyrillo JNSG, Bonilha SFM, Magnani E, Branco RH. Selection for feed efficiency traits and correlated genetic responses in feed intake and weight gain of Nelore cattle. *Journal of Animal Science*. 2014; 92(3):955–65. doi: [10.2527/jas.2013-6682](https://doi.org/10.2527/jas.2013-6682). WOS:000332035900011. PMID: [24492579](https://pubmed.ncbi.nlm.nih.gov/24492579/)
8. Koch RM, Gregory KE, Chambers D, Swiger LA. Efficiency of feed use in beef cattle. *Journal of Animal Science*. 1963; 22(2):486–94. WOS:A19633670B00025.
9. Berry DP, Crowley JJ. Residual intake and body weight gain: A new measure of efficiency in growing cattle. *Journal of Animal Science*. 2012; 90(1):109–15. doi: [10.2527/jas.2011-4245](https://doi.org/10.2527/jas.2011-4245). WOS:000299168500011. PMID: [21890504](https://pubmed.ncbi.nlm.nih.gov/21890504/)
10. Pinheiro TR, Mercadante MEZ, Albuquerque LG, Bonilha SFM, Monteiro FM. Selection for higher body weight in Nelore cattle is effective in achieving an increase of longissimus muscle area without reducing subcutaneous fat thickness. *Revista Brasileira de Zootecnia*. 2012; 41(6):1426–32. WOS:000306570200016.
11. Karin M. WOMBAT—A tool for mixed model analyses in quantitative genetics by restricted maximum likelihood (REML). *Journal of Zhejiang University-Science B*. 2007; 8(11):815–21. doi: [10.1631/jzus.2007.B0815](https://doi.org/10.1631/jzus.2007.B0815). BIOABS:BACD200800012807. PMID: [17973343](https://pubmed.ncbi.nlm.nih.gov/17973343/)
12. Robinson DL, Oddy VH. Genetic parameters for feed efficiency, fatness, muscle area and feeding behaviour of feedlot finished beef cattle. *Livestock Production Science*. 2004; 90(2–3):255–70. doi: [10.1016/j.livprodsci.2004.06.011](https://doi.org/10.1016/j.livprodsci.2004.06.011). WOS:000225110400020.

13. Bonilha SFM, Cyrillo JNSG, Santos GP, Branco RH, Ribeiro EG, Mercadante MEZ. Feed efficiency, blood parameters, and ingestive behavior of young Nelore males and females. *Tropical Animal Health and Production*. 2015; 47(7):1381–9. doi: [10.1007/s11250-015-0875-7](https://doi.org/10.1007/s11250-015-0875-7). WOS:000361062500022. PMID: [26141747](https://pubmed.ncbi.nlm.nih.gov/26141747/)
14. Chizzotti ML, Valadares Filho SC, Tedeschi LO, Chizzotti FHM, Carstens GE. Energy and protein requirements for growth and maintenance of F-1 Nelore x Red Angus bulls, steers, and heifers. *Journal of Animal Science*. 2007; 85(8):1971–81. doi: [10.2527/jas.2006-632](https://doi.org/10.2527/jas.2006-632). WOS:000248043600015. PMID: [17504963](https://pubmed.ncbi.nlm.nih.gov/17504963/)
15. Del Claro AC, Mercadante ME, Silva JAIV. Meta-analysis of genetic parameter estimates of residual feed intake and of its component traits in cattle. *Pesquisa Agropecuaria Brasileira*. 2012; 47(2):302–10. WOS:000303202500020.
16. Rolfe KM, Snelling WM, Nielsen MK, Freetly HC, Ferrell CL, Jenkins TG. Genetic and phenotypic parameter estimates for feed intake and other traits in growing beef cattle, and opportunities for selection. *Journal of Animal Science*. 2011; 89(11):3452–9. doi: [10.2527/jas.2011-3961](https://doi.org/10.2527/jas.2011-3961). WOS:000296562000011. PMID: [21622877](https://pubmed.ncbi.nlm.nih.gov/21622877/)
17. Crews DH. Genetics of efficient feed utilization and national cattle evaluation: a review *Genetics and Molecular Research*. 2005; 4(2):14. Epub 165.
18. Lancaster PA, Carstens GE, Ribeiro FRB, Tedeschi LO, Crews DH Jr. Characterization of feed efficiency traits and relationships with feeding behavior and ultrasound carcass traits in growing bulls. *Journal of Animal Science*. 2009; 87(4):1528–39. doi: [10.2527/jas.2008-1352](https://doi.org/10.2527/jas.2008-1352). WOS:000264195800030. PMID: [18997083](https://pubmed.ncbi.nlm.nih.gov/18997083/)
19. Mao F, Chen L, Vinsky M, Okine E, Wang Z, Basarab J, et al. Phenotypic and genetic relationships of feed efficiency with growth performance, ultrasound, and carcass merit traits in Angus and Charolais steers. *Journal of Animal Science*. 2013; 91(5):2067–76. doi: [10.2527/jas.2012-5470](https://doi.org/10.2527/jas.2012-5470). WOS:000319697600015. PMID: [23463551](https://pubmed.ncbi.nlm.nih.gov/23463551/)
20. Schenkel FS, Miller SP, Wilton JW. Genetic parameters and breed differences for feed efficiency, growth, and body composition traits of young beef bulls. *Canadian Journal of Animal Science*. 2004; 84(2):177–85. WOS:000222889100004.
21. Yokoo MJ, Lobo RB, Araujo FRC, Bezerra LAF, Sainz RD, Albuquerque LG. Genetic associations between carcass traits measured by real-time ultrasound and scrotal circumference and growth traits in Nelore cattle. *Journal of Animal Science*. 2010; 88(1):52–8. doi: [10.2527/jas.2008-1028](https://doi.org/10.2527/jas.2008-1028). WOS:000273072000006. PMID: [19820065](https://pubmed.ncbi.nlm.nih.gov/19820065/)
22. Arthur PF, Archer JA, Johnston DJ, Herd RM, Richardson EC, Parnell PF. Genetic and phenotypic variance and covariance components for feed intake, feed efficiency, and other postweaning traits in Angus cattle. *Journal of Animal Science*. 2001; 79(11):2805–11. WOS:000172643000007. PMID: [11768108](https://pubmed.ncbi.nlm.nih.gov/11768108/)
23. Nkrumah JD, Basarab JA, Wang Z, Li C, Price MA, Okine EK, et al. Genetic and phenotypic relationships of feed intake and measures of efficiency with growth and carcass merit of beef cattle. *Journal of Animal Science*. 2007; 85(10):2711–20. doi: [10.2527/jas.2006-767](https://doi.org/10.2527/jas.2006-767). WOS:000249557700037. PMID: [17526662](https://pubmed.ncbi.nlm.nih.gov/17526662/)
24. Malheiros JM, Baldassini WA, Dias VAD, Silva JAIV, Curi RA, Chardulo LAL. Chemical and sensory meat characteristics of Nelore cattle (*Bos indicus*) finished with different levels of backfat thickness in the longissimus thoracis muscle. *Boletim de Industria Animal*. 2015; 72(4):341–8. WOS:000371808100009.
25. Sakamoto LS, Mercadante MEZ, Bonilha SFM, Branco RH, Bonilha EFM, Magnani E. Prediction of retail beef yield and fat content from live animal and carcass measurements in Nelore cattle. *Journal of Animal Science*. 2014; 92(11):5230–8. WOS:000344622600043. PMID: [25349365](https://pubmed.ncbi.nlm.nih.gov/25349365/)
26. Parnell PF, editor *The consequences of selection for growth-rate in beef cattle*. 20th Biennial Conference of the Australian-Society-of-Animal-Production—Animal Production in Australia; 1994 Jul 04–08; Univ W Australia, Perth, Australia 1994.
27. Sobrinho TL, Bonilha SFM, Goncalves HC, Castilhos AM, Magnani E, Razook AG, et al. Feedlot performance, feed efficiency and carcass traits in Nelore cattle selected for postweaning weight. *Revista Brasileira de Zootecnia*. 2013; 42(2):125–9. WOS:000316123300007.
